# Supplementary material for: Boosting the acidic electrocatalytic nitrogen reduction performance of MoS2 by strain engineering
Source: Royal Society of Chemistry journal article supplement (doi:10.1039/d0ta03622f), 2020-01-01
Supplement: d0ta03622f1.pdf [file d0ta03622f1.pdf]

## Supporting Information

### **Boosting the acidic electrocatalytic nitrogen reduction performance of MoS<sub>2</sub> by strain engineering**

*Jiawei Liang,<sup>a†</sup> Shuangxiu Ma,<sup>a†</sup> Jing Li,<sup>a</sup> Yangang Wang,<sup>c\*</sup> Junli Wu,<sup>a</sup> Quan Zhang,<sup>a</sup> Zhao Liu,<sup>a</sup> Zehui Yang,<sup>a\*</sup> Konggang Qu<sup>b</sup> and Weiwei Cai<sup>a\*</sup>*

J. Liang and S. Ma contribute equally to this work.

<sup>a</sup>Sustainable Energy Laboratory, Faculty of Materials Science and Chemistry, China University of Geosciences, Wuhan, 430074, China. willcai1985@gmail.com (W. Cai), yeungzehui@gmail.com (Z. Yang).

<sup>b</sup>Shandong Provincial Key Laboratory/Collaborative Innovation Center of Chemical Energy Storage & Novel Cell Technology, Liaocheng University, Liaocheng, 252059, China.

<sup>c</sup>College of Biological Chemical Science and Engineering, Jiaying University, Jiaying, Zhejiang, 314001, China. ygwang8136@mail.zjxu.edu.cn (Y. Wang)

**Physical characterizations.** The micromorphology and elemental distribution of the catalyst samples were observed and contrasted by a field emission scanning electron microscopy (FESEM, Hitachi SU8000, Japan) and high-resolution transmission electron microscopy (HRTEM, FEI Tecnai G2 F30; Thermo Fisher Titan Themis G2) equipped with an energy-dispersive X-ray Spectroscopy (EDS, Oxford INCA x-sight, England). X-ray photoelectron spectra (XPS) were recorded using an Escalab 250XI spectrometer (ThermoFisher, USA). The specific surface area was measured by the Brunauer-Emmett-Teller (BET) method based on the N<sub>2</sub> adsorption isotherm measurement using a Microactive for ASAP 2460 (Micromeritics Instrument Corporation). The absorbance data of spectrophotometer were collected utilizing UV-Vis spectrophotometer. N<sub>2</sub>-TPD detection was conducted by AutoChem 2950 HP chemical adsorption instrument.

**Electrochemical measurements.** Prior N<sub>2</sub> electrochemical reduction, Nafion 211 membrane was firstly treated to remove the impurities. Nafion 211 membrane was oxidized in 3% H<sub>2</sub>O<sub>2</sub> solution at 90 °C for 1 h and boiled in ultrapure water for another 1 h, and then soaked in 0.5 M H<sub>2</sub>SO<sub>4</sub> overnight. After rinsing several times with ultrapure water, the membrane was employed to isolate cathode and anode in H-type electrolytic cell device. All electrochemical measurements were performed by the Gamry interface 1000e potentiostat with a typical three-electrode system. In brief, 5 mg of the as-prepared electrocatalysts were ultrasonically dispersed in 800 μL of deionized water, 175 μL of isopropanol and 25 μL of Nafion solution for 1 h to acquire homogeneous dispersion. Thereafter, 7 μL of the resultant ink was loaded onto the surface of glassy carbon electrode with a diameter of 3 mm and then air-dried to be served as a working electrode (mass loading of 0.5 mg cm<sup>-2</sup>). A graphite rod was employed as the counter electrode and saturated calomel electrode (SCE) as the reference electrode. The N<sub>2</sub> electrochemical reduction was performed at applied potentials for 2 h in N<sub>2</sub>-saturated 0.05 M H<sub>2</sub>SO<sub>4</sub> under room temperature. Linear sweep voltammetry (LSV) was conducted at scan rate of 5 mV s<sup>-1</sup> to estimate the electrocatalytic activity for N<sub>2</sub> reduction in N<sub>2</sub> or Ar saturated

electrolyte. Cyclic voltammetry (CV) was performed between 0.16 and 0.26 V at different scanning rates ranging from 10 to 100 mV s<sup>-1</sup> to calculate the double layer capacitances (C<sub>dl</sub>). Prior to the measurement, the electrolyte was purged with N<sub>2</sub> or Ar for at least 30 min. All of the potentials referred in this work were converted to values with reference to a reversible hydrogen electrode (RHE) and the current density was normalized to the geometrical surface area of electrode.

**Quantification of ammonia.** The different amount of NH<sub>3</sub> present was detected by the indophenol blue method. Typically, 2 mL of electrolyte was removed for the electrolytic cell after chronoamperometric tests. Subsequently, 2 mL of 1 M sodium hydroxide solution containing salicylic acid (5 wt%) and sodium citrate (5 wt%) was added, followed by addition of 1 mL of 0.05 M sodium hypochlorite and 0.2 mL of sodium nitroferricyanide solution (1 wt%). After setting aside for 1 h to fully develop color, the ultraviolet-visible (UV-vis) absorption spectra were employed to examine the colored solution with the absorption peak at 655 nm. The concentration-absorbance curves were calibrated utilizing standard NH<sub>3</sub> solution with a series of concentrations in 0.05 M H<sub>2</sub>SO<sub>4</sub>.

The yield rate of NH<sub>3</sub> production can be calculated according to the following equation:

$$v_{\text{NH}_3} = \frac{c \times V}{t \times m_{\text{cat}}}$$

The Faradaic efficiency (FE) for N<sub>2</sub> reduction was estimated from dividing the total charge consumed for the electrodes by the quantity of electric charge for NH<sub>3</sub> production and the total charge passed through the electrodes during the electrolysis, and the FE was calculated using the following equation:

$$\text{FE} = \frac{3 \times F \times c \times V}{17 \times Q}$$

where  $F$  is the Faraday constant ( $96485 \text{ C mol}^{-1}$ );  $c$  is the measured  $\text{NH}_3$  concentration;  $V$  is the volume of the electrolyte for  $\text{NH}_3$  collection;  $t$  is the duration of chronoamperometric test;  $m_{\text{cat}}$  is the catalyst loading mass at the work electrode;  $Q$  is the quantity of applied electricity.

***Nuclear magnetic resonance (NMR) spectroscopy.*** In the electrocatalytic NRR experiment, Argon gas was purged to the cathodic cell to remove impurity gas and then purging for 30 min with the gas to be tested. After electrolysis at  $-0.2 \text{ V vs. RHE}$  for 2 h, 50 mL of the electrolyte was taken out and acidized to  $\text{pH}=3$  by adding  $\text{H}_2\text{SO}_4$  ( $\text{pH}=1$ ), and then concentrated to 5 mL by heating via reduced pressure distillation. Afterwards, 0.55 mL of the resulting solution was taken out and mixed with 0.05 mL  $\text{D}_2\text{O}$  for  $^1\text{H-NMR}$  measurement. A total of 1024 transient scans were recorded with an interscan delay of 1 s. 64 K complex points was acquired for each FID with an acquisition time of 3.4 s. The produced ammonia was quantitatively detected by using  $^1\text{H-NMR}$  means on a Bruker AVANCE III HD 400 instrument. A known amount of  $\text{D}_2\text{O}$  was used as an internal standard.

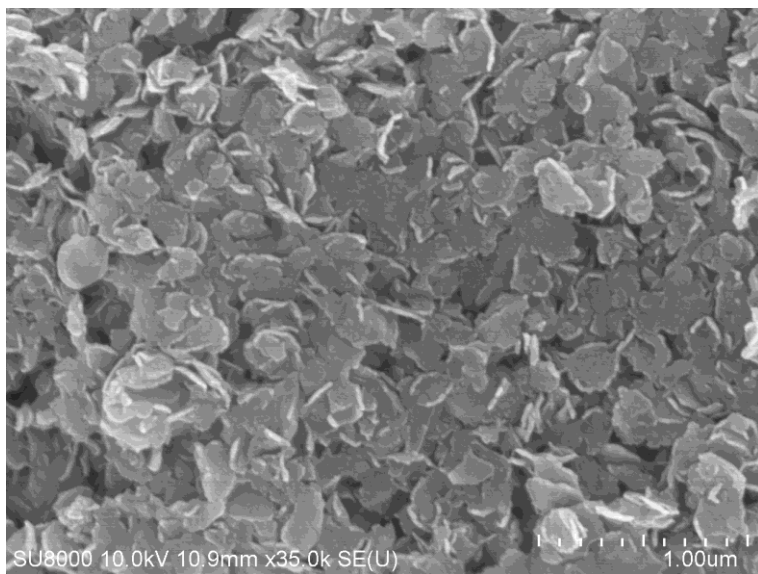

Figure S1. SEM image of the pristine MoS<sub>2</sub>.

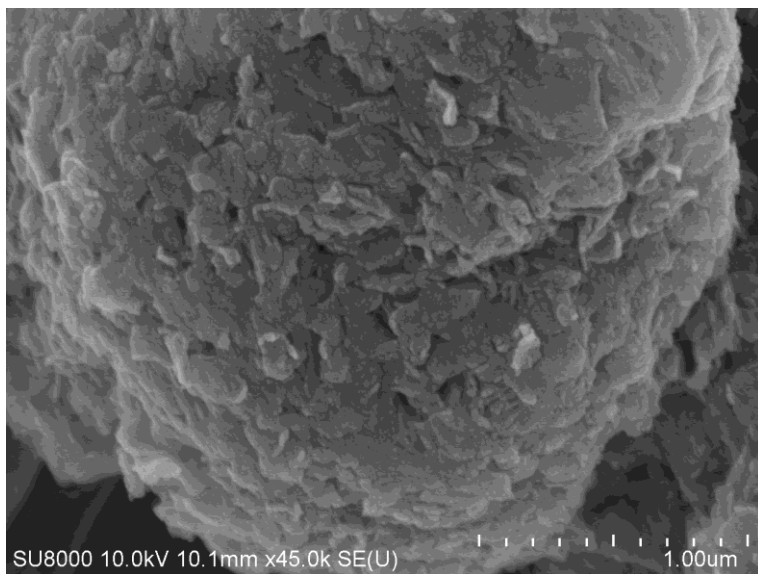

Figure S2. SEM image of the F-MoS<sub>2</sub>-2.

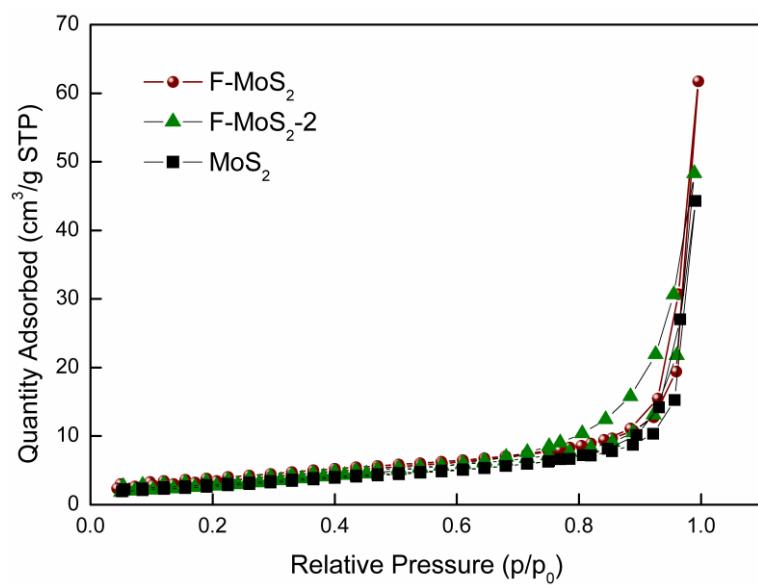

Figure S3. N<sub>2</sub> adsorption-desorption isotherms of MoS<sub>2</sub>, F-MoS<sub>2</sub> and F-MoS<sub>2</sub>-2.

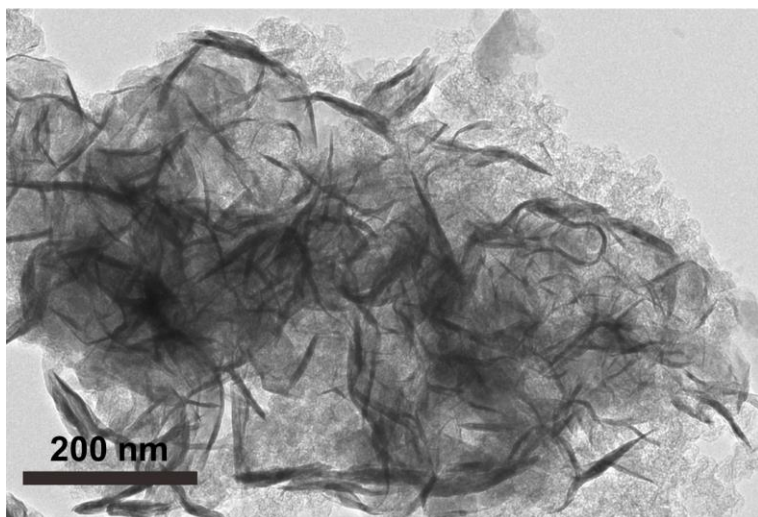

Figure S4. TEM image of the F-MoS<sub>2</sub>.



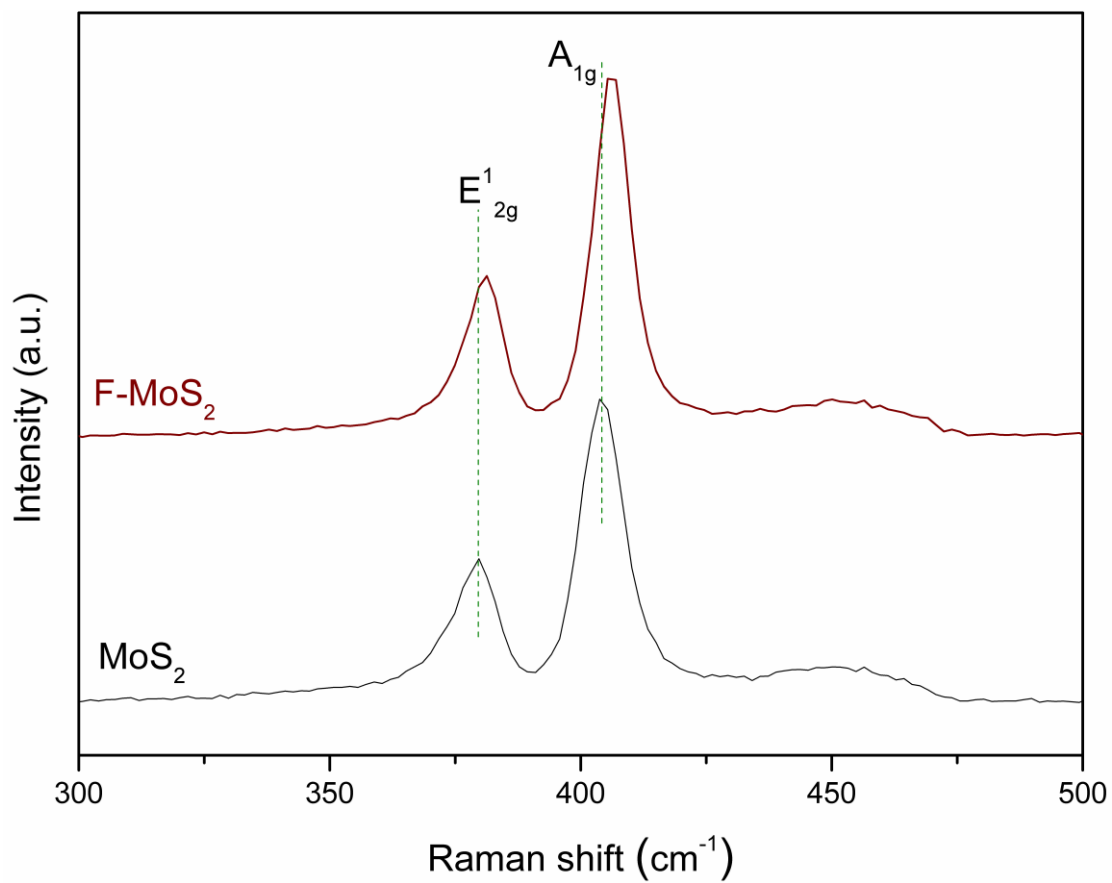

Figure S5. Raman spectra of the F-MoS<sub>2</sub> and the pristin MoS<sub>2</sub>.

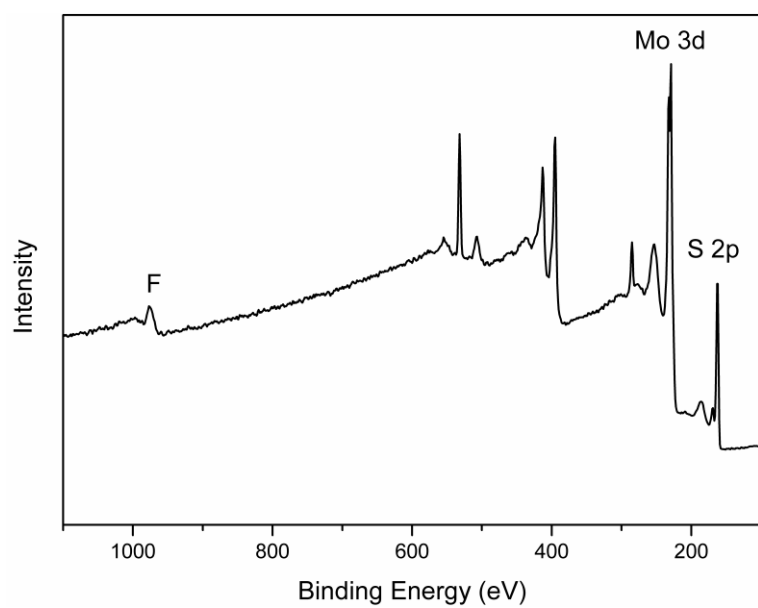

Figure S6. Survey XPS spectra of the F-MoS<sub>2</sub> catalyst.

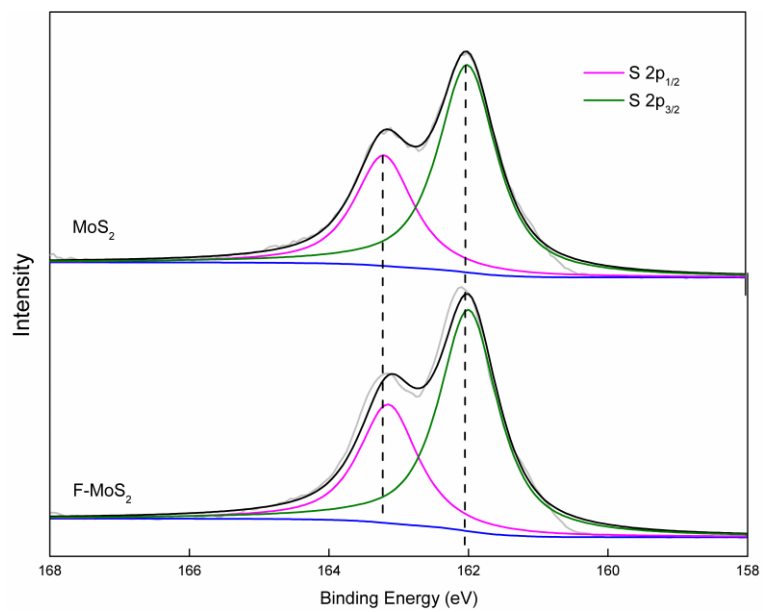

Figure S7. Comparison between the S 2p XPS spectra of the pristine MoS<sub>2</sub> and F-MoS<sub>2</sub> catalysts.

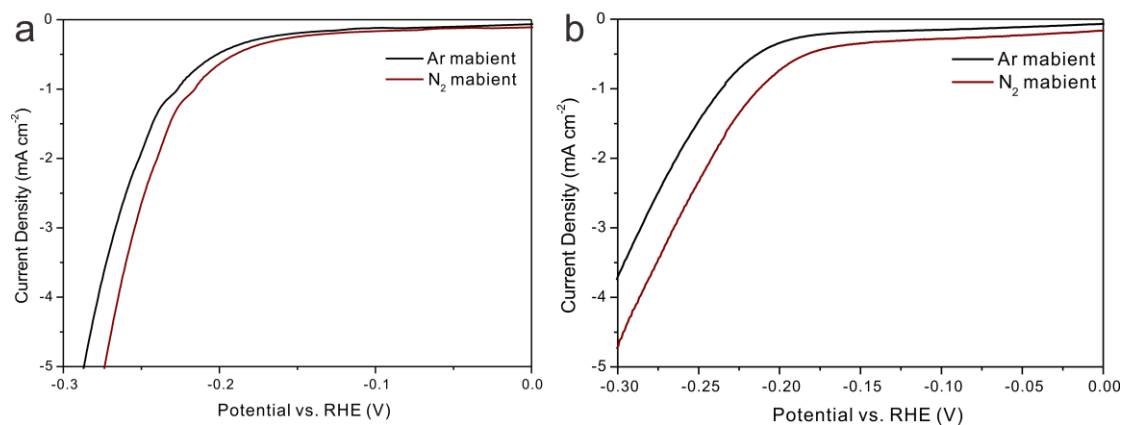

Figure S8. LSV curves of (a) MoS<sub>2</sub> and (b) F-MoS<sub>2</sub> measured at 0.05 M H<sub>2</sub>SO<sub>4</sub> saturated with Ar and N<sub>2</sub>.

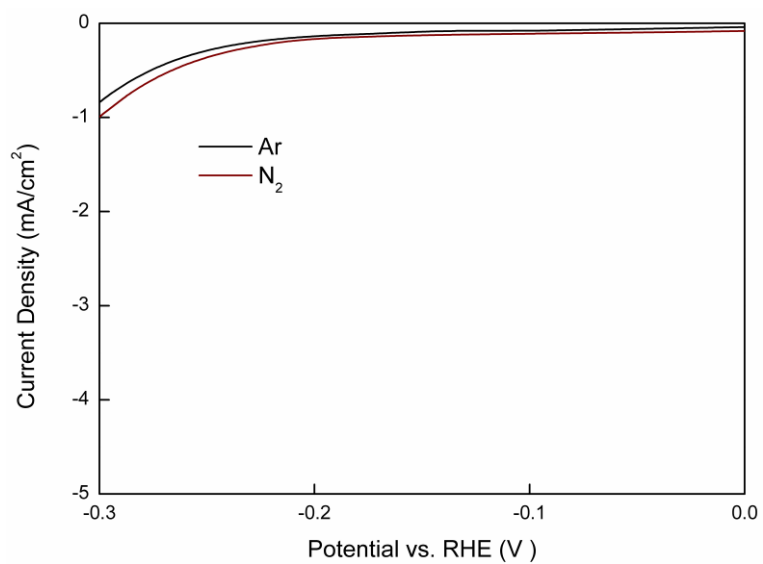

Figure S9. LSV curves of F-MoS<sub>2</sub>-2 measured at 0.05 M H<sub>2</sub>SO<sub>4</sub> saturated with Ar and N<sub>2</sub>.

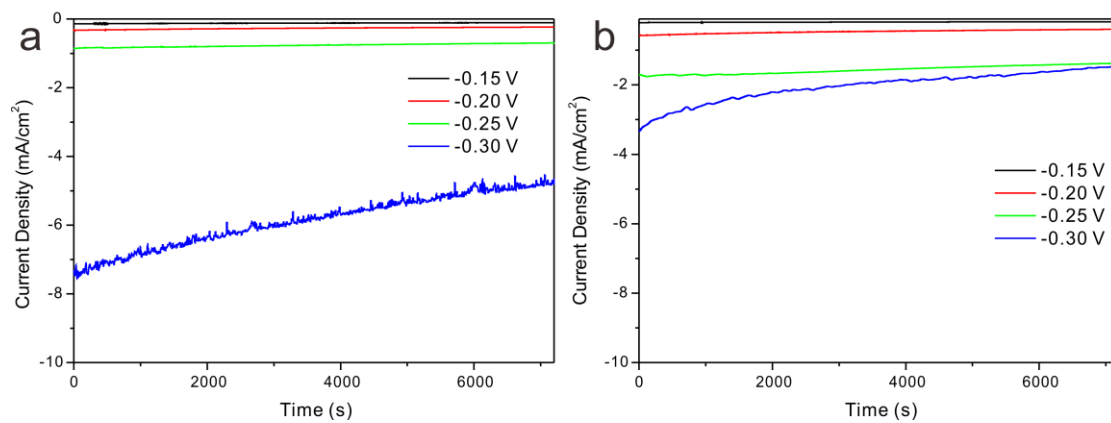

Figure S10. Chronoamperometry (CA) of (a) MoS<sub>2</sub> and (b) F-MoS<sub>2</sub> measured at -0.15V to -0.30 V vs. RHE in N<sub>2</sub> saturated 0.05 M H<sub>2</sub>SO<sub>4</sub> solutions.

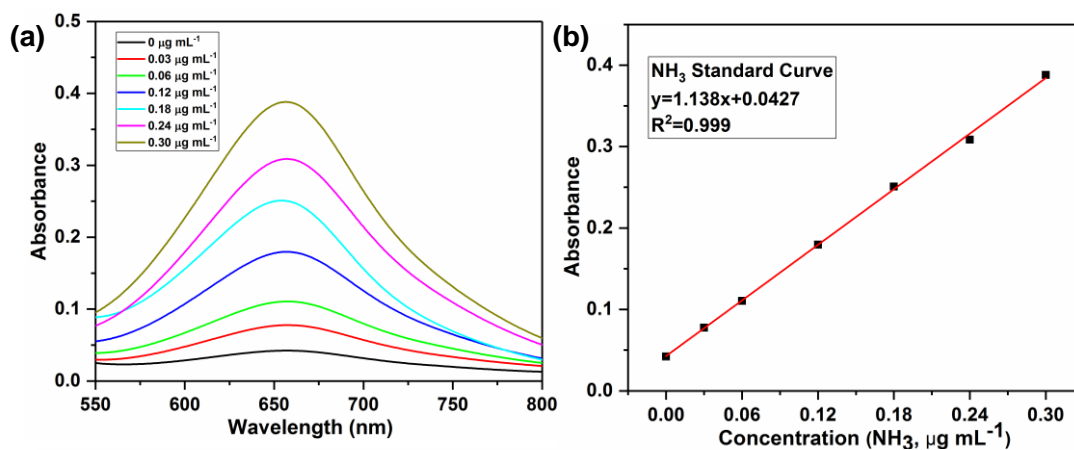

Figure S11. Calibration curve for colorimetric NH<sub>3</sub> assay using Nessler reagent.

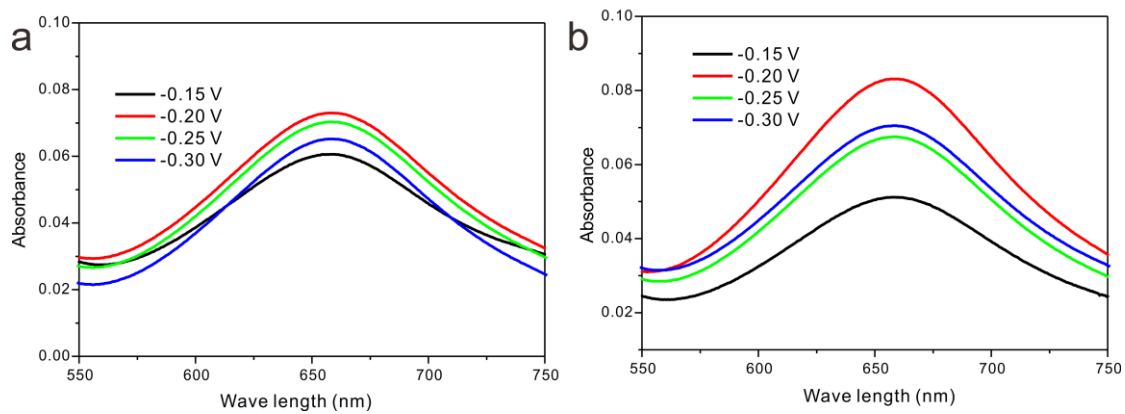

Figure S12. UV-vis absorption spectra of the electrolyte stained with indophenol indicator after 2 h electrolysis at a series of potentials for (a) MoS<sub>2</sub> and (b) F-MoS<sub>2</sub>.



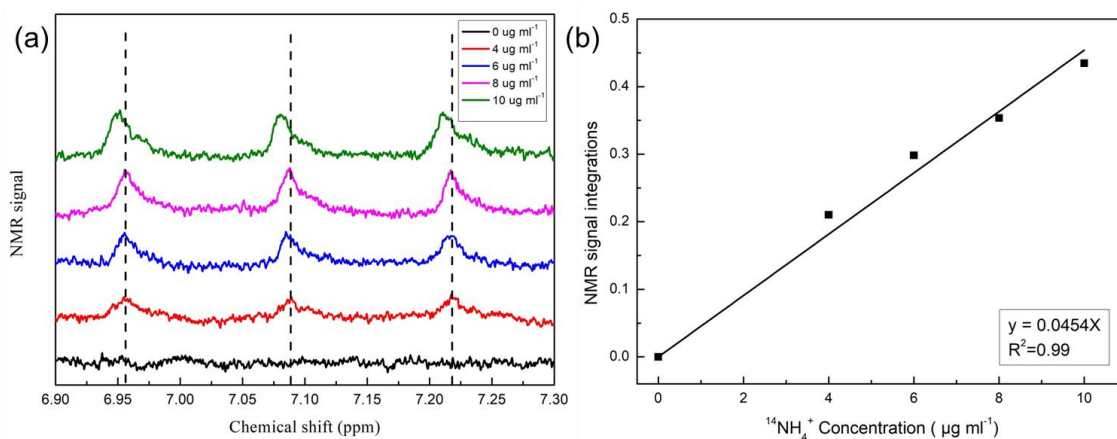

Figure S13. (a) NMR spectra of various  $(\text{NH}_4)_2\text{SO}_4$  concentrations. (b) Plots of peak intensity as function of  $(\text{NH}_4)_2\text{SO}_4$  concentrations.

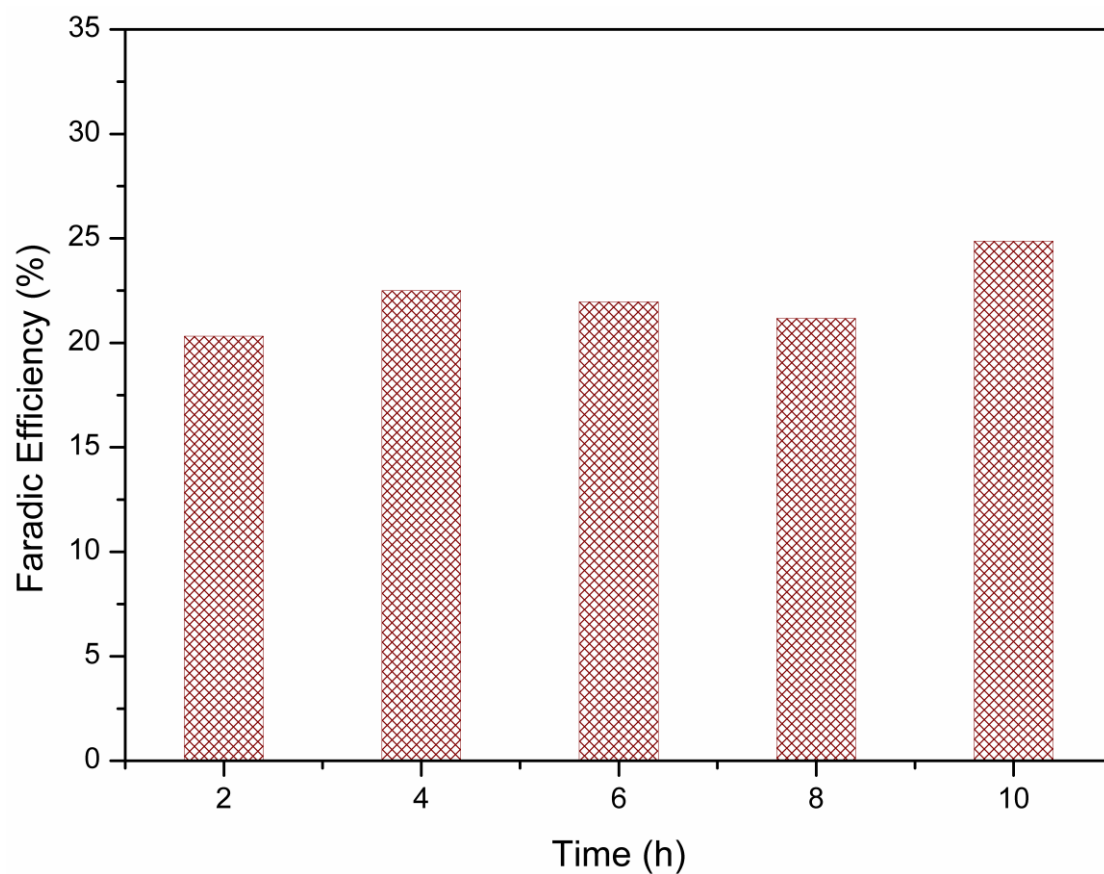

Figure S14. Faradic efficiency of F-MoS<sub>2</sub> toward NRR during the 10 h durability test at -0.2 V vs. RHE.

Table S1. Comparison of electrocatalytic N<sub>2</sub> reduction performance of F-MoS<sub>2</sub> with recently developed cost-effective electrocatalysts in acidic conditions.

| Catalyst                                                         | Electrolyte                            | FE%   | NH <sub>3</sub> (μg h <sup>-1</sup> mg <sub>cat.</sub> <sup>-1</sup> ) | Ref.      |
|------------------------------------------------------------------|----------------------------------------|-------|------------------------------------------------------------------------|-----------|
| <b>F-MoS<sub>2</sub></b>                                         | 0.05 H <sub>2</sub> SO <sub>4</sub>    | 20.6  | 35.7                                                                   | This work |
| NbO <sub>2</sub> nanoparticles                                   | 0.05 M H <sub>2</sub> SO <sub>4</sub>  | 19.7  | 11.6                                                                   | [1]       |
| B <sub>4</sub> C nanosheet                                       | 0.1 M HCl                              | 15.95 | 26.57                                                                  | [2]       |
| N-deficient Mo <sub>2</sub> N                                    | 0.1 HCl                                | 4.5   | 78.4                                                                   | [3]       |
| Bi <sub>4</sub> V <sub>2</sub> O <sub>11</sub> /CeO <sub>2</sub> | 0.1 M HCl                              | 10.16 | 23.21                                                                  | [4]       |
| S-G                                                              | 0.1 M HCl                              | 11.5  | 27.3                                                                   | [5]       |
| NC                                                               | 0.1 M HCl                              | 12.3  | 3.87                                                                   | [6]       |
| Mo nanofilm                                                      | 0.01 M H <sub>2</sub> SO <sub>4</sub>  | 0.72  | 1.89 μg h <sup>-1</sup> cm <sup>-2</sup>                               | [7]       |
| O-CN                                                             | 0.1 M HCl                              | 4.97  | 20.15                                                                  | [8]       |
| FL-BP                                                            | 0.01 M HCl                             | 5.07  | 31.37                                                                  | [9]       |
| NPC                                                              | 0.005 M H <sub>2</sub> SO <sub>4</sub> | 9.98  | 22.2                                                                   | [10]      |
| PCN                                                              | 0.1 M HCl                              | 11.59 | 8.09                                                                   | [11]      |
| MoN                                                              | 0.1 M HCl                              | 1.15  | 18.42 μg h <sup>-1</sup> cm <sup>-2</sup>                              | [12]      |
| N, P doped C                                                     | 0.1 M HCl                              | 4.2   | 0.97                                                                   | [13]      |
| N-doped porous carbon                                            | 0.05 M H <sub>2</sub> SO <sub>4</sub>  | 1.42  | 23.8                                                                   | [14]      |

## References

- [1] L. Huang, J. Wu, P. Han, A. M. Al-Enizi, T. M. Almutairi, L. Zhang, G. Zheng, *Small Methods* **2018**, *3*, 1800386.
- [2] W. Qiu, X.-Y. Xie, J. Qiu, W.-H. Fang, R. Liang, X. Ren, X. Ji, G. Cui, A. M. Asiri, G. Cui, B. Tang, X. Sun, *Nat. Commun.* **2018**, *9*, 3485.
- [3] X. Ren, G. Cui, L. Chen, F. Xie, Q. Wei, Z. Tian, X. Sun, *Chem. Commun.* **2018**, *54*, 8474-8477.
- [4] C. Lv, C. Yan, G. Chen, Y. Ding, J. Sun, Y. Zhou, G. Yu, *Angew. Chem. Int. Ed.* **2018**, *57*, 6073-6076.
- [5] L. Xia, J. Yang, H. Wang, R. Zhao, H. Chen, W. Fang, A. M. Asiri, F. Xie, G. Cui, X. Sun, *Chem. Commun.* **2019**, *55*, 3371-3374.
- [6] Q. Qin, T. Heil, M. Antonietti, M. Oschatz, *Small Methods* **2018**, *2*, 1800202.
- [7] D. Yang, T. Chen, Z. Wang, *J. Mater. Chem. A* **2017**, *5*, 18967-18971.
- [8] H. Huang, L. Xia, R. Cao, Z. Niu, H. Chen, Q. Liu, T. Li, X. Shi, A. M. Asiri, X. Sun, *Chem. Eur. J.* **2019**, *25*, 1914-1917.
- [9] L. Zhang, L.-X. Ding, G.-F. Chen, X. Yang, H. Wang, *Angew. Chem.* **2019**, *131*, 2638-2642.
- [10] C. Zhao, S. Zhang, M. Han, X. Zhang, Y. Liu, W. Li, C. Chen, G. Wang, H. Zhang, H. Zhao, *ACS Energy Lett.* **2019**, *4*, 377-383.
- [11] C. Lv, Y. Qian, C. Yan, Y. Ding, Y. Liu, G. Chen, G. Yu, *Angew. Chem. Int. Ed.* **2018**, *57*, 10246-10250.
- [12] L. Zhang, X. Ji, X. Ren, Y. Luo, X. Shi, A. M. Asiri, B. Zheng, X. Sun, *ACS Sustain. Chem. Eng.* **2018**, *6*, 9550-9554.
- [13] P. Song, H. Wang, L. Kang, B. Ran, H. Song, R. Wang, *Chem. Commun.* **2019**, *55*, 687-690.
- [14] Y. Liu, Y. Su, X. Quan, X. Fan, S. Chen, H. Yu, H. Zhao, Y. Zhang, J. Zhao, *ACS Catal.* **2018**, *8*, 1186-1191.
